# Supplementary material for: Surface phosphation of 3D mesoporous NiCo2O4 nanowire arrays as bifunctional anodes for lithium and sodium ion batteries
Source: Royal Society of Chemistry journal article supplement (doi:10.1039/c8ra05128c), 2018-01-01
Supplement: c8ra05128c1.pdf [file c8ra05128c1.pdf]

## Supporting Information

### Surface Phosphation of 3D Mesoporous NiCo<sub>2</sub>O<sub>4</sub> Nanowire Arrays as a Bifunctional Anode for Lithium and Sodium Ion Battery

Wenda Qiu,<sup>\*ab</sup> Hongbing Xiao,<sup>a</sup> Wenting He,<sup>a</sup> Juanhua Li,<sup>a</sup> An Luo,<sup>a</sup> Yu Li,<sup>a</sup> and Yexiang Tong<sup>b</sup>

<sup>a</sup> School of Eco-Environmental Technology, Guangdong Industry Polytechnic, 152 Xingang West Road, Guangzhou 510300, China.

<sup>b</sup> MOE of the Key Laboratory of Bioinorganic and Synthetic Chemistry, KLGHEI of Environment and Energy Chemistry, School of Chemistry and Chemical Engineering, Sun Yat-Sen University, 135 Xingang West Road, Guangzhou 510275, China.

\*Corresponding Author. E-mail: [Qiuwdgq@hotmail.com](mailto:Qiuwdgq@hotmail.com)

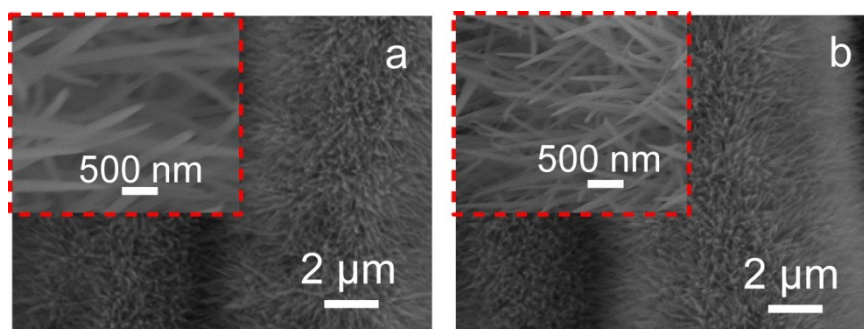

**Fig. S1** SEM images of (a) NiCo<sub>2</sub>O<sub>4</sub> NWAs, (b) P-NiCo<sub>2</sub>O<sub>4</sub> NWAs.

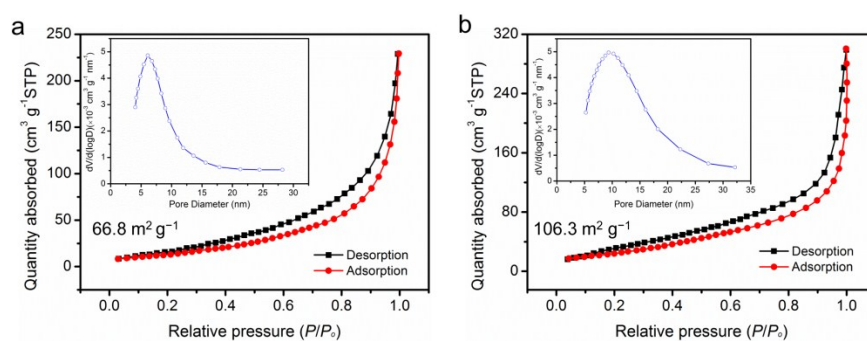

**Fig. S2** N<sub>2</sub> adsorption-desorption isotherm of the NiCo<sub>2</sub>O<sub>4</sub> NWAs (a) and P-NiCo<sub>2</sub>O<sub>4</sub> NWAs (b). The inset is the corresponding pore size distribution.

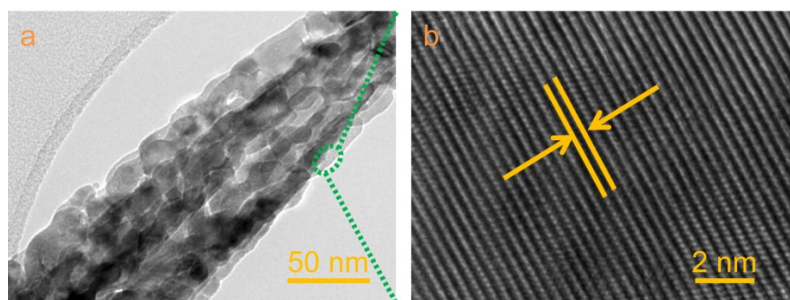

**Fig. S3** (a) TEM, (b) HRTEM images of pristine  $\text{NiCo}_2\text{O}_4$  NWAs. (b) is lattice-resolved TEM image of selective area in the region marked with a green dotted circle.

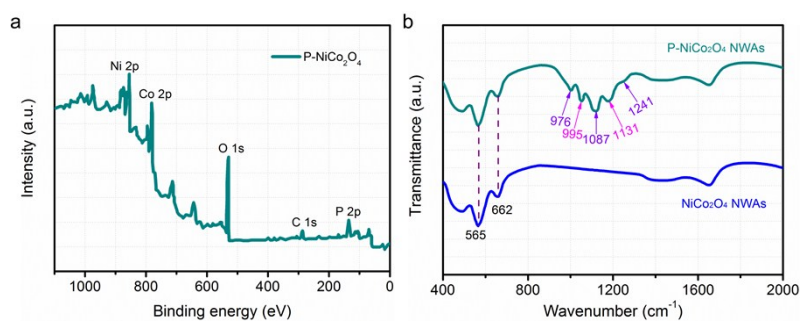

**Fig. S4** (a) XPS survey spectra of P- $\text{NiCo}_2\text{O}_4$  NWAs. (b) FTIR spectra of  $\text{NiCo}_2\text{O}_4$  NWAs and P- $\text{NiCo}_2\text{O}_4$  NWAs. Both tests were scratched down from the Ni foam.

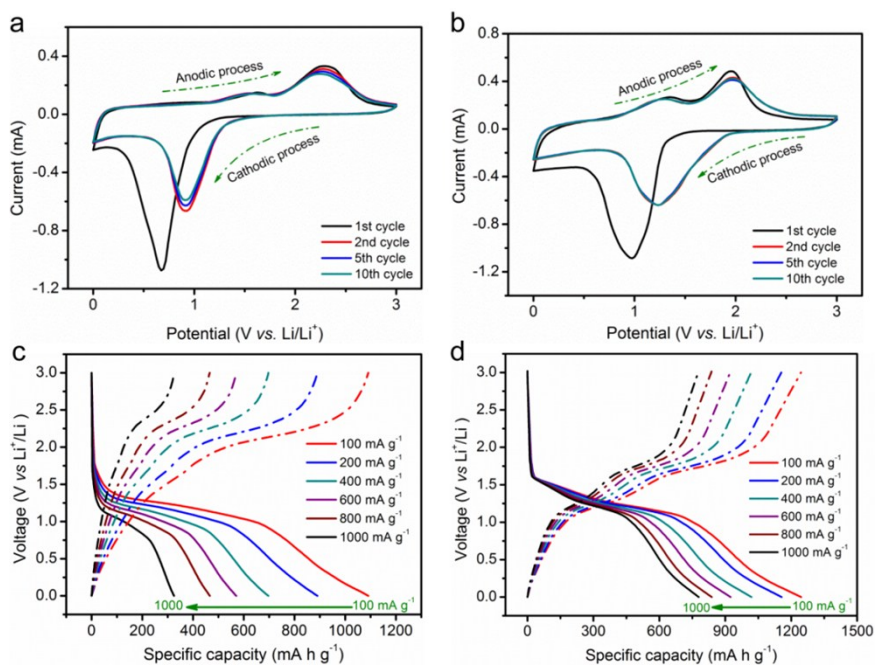

**Fig. S5** (a, b) 1st, 2nd, 5th, 10th CV curves at the scanning rate of  $0.2 \text{ mV s}^{-1}$  of  $\text{NiCo}_2\text{O}_4$  NWAs and P- $\text{NiCo}_2\text{O}_4$  NWAs electrode, respectively; (c, d) Charge/discharge curves at different rates of  $\text{NiCo}_2\text{O}_4$  NWAs and P- $\text{NiCo}_2\text{O}_4$  NWAs electrode, respectively.

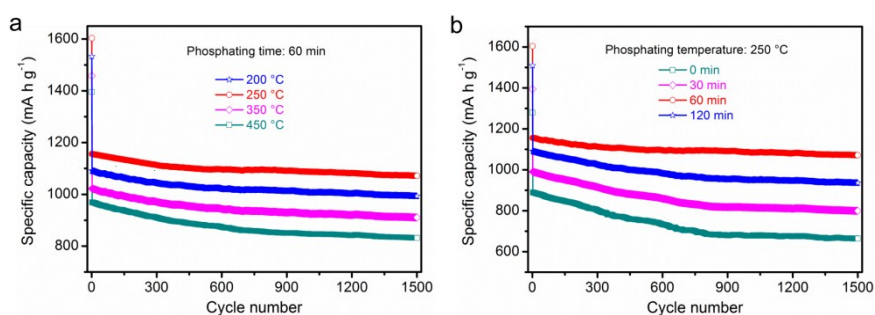

**Fig. S6** Cycling performance collected at  $200 \text{ mA g}^{-1}$  of P- $\text{NiCo}_2\text{O}_4$  NWAs electrode with different phosphating temperature (a) and different phosphating time (b).

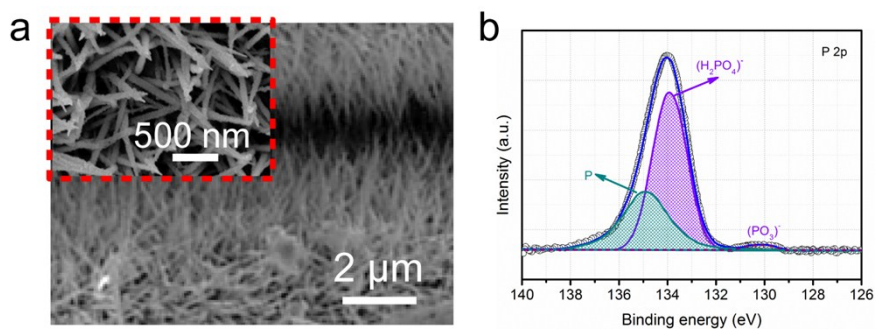

**Fig. S7** (a) SEM image and (b) P 2p core-level XPS spectrum of the P-NiCo<sub>2</sub>O<sub>4</sub> NWAs electrode after 1500 cycles for LIBs.

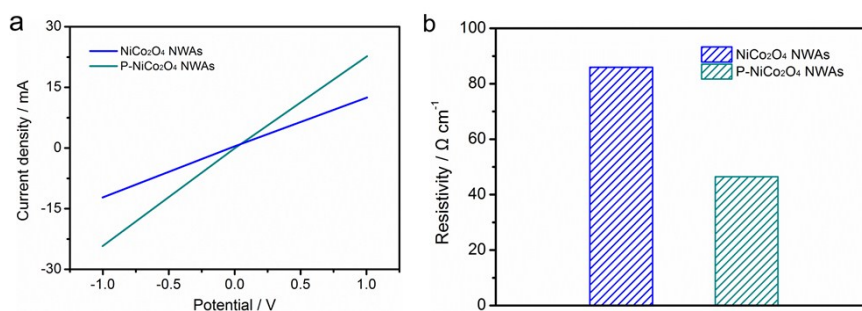

**Fig. S8** (a) Linear sweep voltammetry curves at 10 mV s<sup>-1</sup> and (b) calculated linear resistivities of the NiCo<sub>2</sub>O<sub>4</sub> NWAs and P-NiCo<sub>2</sub>O<sub>4</sub> NWAs electrodes.

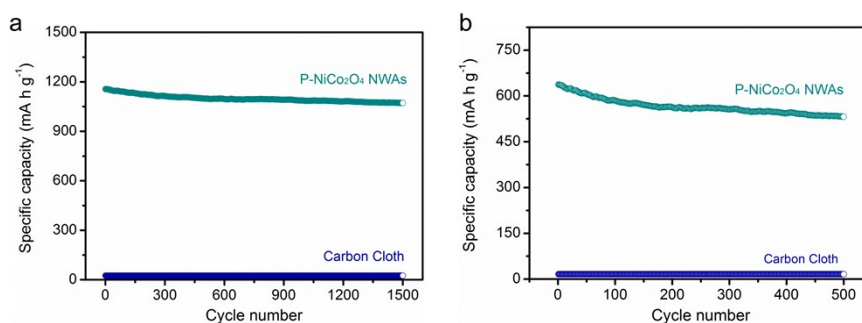

**Fig. S9** Long cycling test of the P-NiCo<sub>2</sub>O<sub>4</sub> NWAs and carbon cloth for (a) Li storage and (b) Na storage 200 mA g<sup>-1</sup>.

**Table S1.** Comparison of lithium storage performance of different NiCo<sub>2</sub>O<sub>4</sub> electrodes.

| Type of material                                                          | Capacity (mA h g <sup>-1</sup> ) | Rate performance                        | Cyclability (cycles) | Ref.      |
|---------------------------------------------------------------------------|----------------------------------|-----------------------------------------|----------------------|-----------|
| P-NiCo <sub>2</sub> O <sub>4</sub><br>NWAs                                | 1156 (200 mA g <sup>-1</sup> )   | 62.6% (100 to 1000 mA g <sup>-1</sup> ) | 91.7% (1500)         | This work |
| NiCo <sub>2</sub> O <sub>4</sub> -C<br>nanorods                           | 1150 (100 mA g <sup>-1</sup> )   | 57% (100 to 2000 mA g <sup>-1</sup> )   | 79.8% (200)          | [1]       |
| NiCo <sub>2</sub> O <sub>4</sub><br>nanosheets                            | 1149 (100 mA g <sup>-1</sup> )   | 42.3% (100 to 1000 mA g <sup>-1</sup> ) | 86% (50)             | [2]       |
| NiCo <sub>2</sub> O <sub>4</sub><br>microflowers                          | 1127 (200 mA g <sup>-1</sup> )   | 41% (100 to 1600 mA g <sup>-1</sup> )   | 75.2% (60)           | [3]       |
| rGO/NiCo <sub>2</sub> O <sub>4</sub>                                      | 1095 (200 mA g <sup>-1</sup> )   | 35.7% (100 to 1000 mA g <sup>-1</sup> ) | 81.7% (500)          | [4]       |
| NiCo <sub>2</sub> O <sub>4</sub> /carbon<br>textiles                      | 1053 (200 mA g <sup>-1</sup> )   | 58.7% (200 to 3000 mA g <sup>-1</sup> ) | 84% (100)            | [5]       |
| NiCo <sub>2</sub> O <sub>4</sub> @SnO <sub>2</sub><br>@C                  | 1016 (100 mA g <sup>-1</sup> )   | 31.7% (100 to 1000 mA g <sup>-1</sup> ) | 55.6% (100)          | [6]       |
| NiCo <sub>2</sub> O <sub>4</sub>                                          | 1003 (200 mA g <sup>-1</sup> )   | 31% (100 to 1600 mA g <sup>-1</sup> )   | 61.6% (500)          | [7]       |
| NiCo <sub>2</sub> O <sub>4</sub><br>nanorods                              | 1002 (100 mA g <sup>-1</sup> )   | 44.9% (100 to 2000 mA g <sup>-1</sup> ) | 67.7% (150)          | [8]       |
| NiCo <sub>2</sub> O <sub>4</sub> -RGO<br>Flower-like                      | 974 (100 mA g <sup>-1</sup> )    | 41% (100 to 800 mA g <sup>-1</sup> )    | 80.1% (70)           | [9]       |
| NiCo <sub>2</sub> O <sub>4</sub><br>NiCo <sub>2</sub> O <sub>4</sub>      | 958 (150 mA g <sup>-1</sup> )    | 46.3% (150 to 2000 mA g <sup>-1</sup> ) | 82% (60)             | [10]      |
| NiCo <sub>2</sub> O <sub>4</sub> hollow<br>spheres                        | 931 (150 mA g <sup>-1</sup> )    | 57% (150 to 2000 mA g <sup>-1</sup> )   | 78% (100)            | [11]      |
| NiCo <sub>2</sub> O <sub>4</sub> @NiCo<br><sub>2</sub> O <sub>4</sub> NCA | 925 (120 mA g <sup>-1</sup> )    | 44% (120 to 960 mA g <sup>-1</sup> )    | 89.7% (100)          | [12]      |
| NiCo <sub>2</sub> O <sub>4</sub> NWAs<br>Plum-like                        | 912 (200 mA g <sup>-1</sup> )    | 15% (100 to 1000 mA g <sup>-1</sup> )   | 27.1% (50)           | [13]      |
| NiCo <sub>2</sub> O <sub>4</sub><br>NiCo <sub>2</sub> O <sub>4</sub>      | 838 (100 mA g <sup>-1</sup> )    | 62.6% (100 to 1000 mA g <sup>-1</sup> ) | 96% (50)             | [14]      |
| UNF@NiCo <sub>2</sub> O <sub>4</sub>                                      | 815 (100 mA g <sup>-1</sup> )    | 50.2% (100 to 800 mA g <sup>-1</sup> )  | 76.4% (100)          | [15]      |

**Table S2.** Comparison of sodium storage performance of different NiCo<sub>2</sub>O<sub>4</sub> electrodes.

| Type of material                           | Capacity (mA h g <sup>-1</sup> ) | Rate performance                        | Cyclability (cycles) | Ref.      |
|--------------------------------------------|----------------------------------|-----------------------------------------|----------------------|-----------|
| P-NiCo <sub>2</sub> O <sub>4</sub> NWAs    | 687 (100 mA g <sup>-1</sup> )    | 54.5% (100 to 1000 mA g <sup>-1</sup> ) | 83.5% (500)          | This work |
| NiCo <sub>2</sub> O <sub>4</sub> -NBs      | 635 (50 mA g <sup>-1</sup> )     | No data                                 | 51.6% (30)           | [16]      |
| NiCo <sub>2</sub> O <sub>4</sub> -UNSSs    | 610 (100 mA g <sup>-1</sup> )    | 24.6% (100 to 1000 mA g <sup>-1</sup> ) | 32.4% (50)           | [17]      |
| NiCo <sub>2</sub> O <sub>4</sub>           | 594 (100 mA g <sup>-1</sup> )    | 41.5% (50 to 500 mA g <sup>-1</sup> )   | No negligible        | [18]      |
| NiCo <sub>2</sub> O <sub>4</sub> @CFC      | 547 (100 mA g <sup>-1</sup> )    | 47.7% (50 to 400 mA g <sup>-1</sup> )   | 81% (50)             | [19]      |
| NiCo <sub>2</sub> O <sub>4</sub> microrods | 431 (100 mA g <sup>-1</sup> )    | 30.3% (100 to 1000 mA g <sup>-1</sup> ) | No data              | [20]      |
| NiCo <sub>2</sub> O <sub>4</sub> @G        | 405 (100 mA g <sup>-1</sup> )    | 28.2% (100 to 3200 mA g <sup>-1</sup> ) | 95% (100)            | [21]      |
| NiCo <sub>2</sub> O <sub>4</sub>           | 395 (50 mA g <sup>-1</sup> )     | 75.6% (50 to 400 mA g <sup>-1</sup> )   | 67.8% (50)           | [22]      |
| C@SnO <sub>x</sub> /Cu                     | 893 (50 mA g <sup>-1</sup> )     | 29.3% (50 to 1000 mA g <sup>-1</sup> )  | 86.5% (100)          | [23]      |
| SnO-2L                                     | 743 (100 mA g <sup>-1</sup> )    | 53.5% (100 to 2000 mA g <sup>-1</sup> ) | 76% (100)            | [24]      |
| C@SnS/SnO <sub>2</sub> @Gr                 | 726 (30 mA g <sup>-1</sup> )     | 42.3% (30 to 7290 mA g <sup>-1</sup> )  | 73.8% (500)          | [25]      |
| Fe <sub>2</sub> O <sub>3</sub> /rGO        | 613 (50 mA g <sup>-1</sup> )     | 34% (50 to 2000 mA g <sup>-1</sup> )    | 71.2% (100)          | [26]      |
| SnO <sub>2</sub> /CNT                      | 323 (100 mA g <sup>-1</sup> )    | 53.3% (100 to 1600 mA g <sup>-1</sup> ) | 63.5% (100)          | [27]      |
| TiO <sub>2</sub> /C nanofiber              | 254 (50 mA g <sup>-1</sup> )     | 64.8% (50 to 2000 mA g <sup>-1</sup> )  | 84% (1000)           | [28]      |
| MoO <sub>3-x</sub>                         | 165 (50 mA g <sup>-1</sup> )     | 48.6% (50 to 1000 mA g <sup>-1</sup> )  | No negligible        | [29]      |
| rGO-TiO <sub>2</sub>                       | 128 (20 mA g <sup>-1</sup> )     | 44.7% (50 to 4000 mA g <sup>-1</sup> )  | 69.8% (300)          | [30]      |

## References

- [1] L. Peng, H. Zhang, Y. Bai, J. Yang, Y. Wang, *J. Mater. Chem. A*, 2015, **3**, 22094.
- [2] A.K. Mondal, D. Su, S. Chen, K. Kretschmer, X. Xie, H.J. Ahn, G. Wang, *ChemPhysChem*, 2015, **16**, 169.
- [3] J. Xu, L. He, W. Xu, H. Tang, H. Liu, T. Han, C. Zhang, Y. Zhang, *Electrochim. Acta*, 2014, **145**, 185-192.

- [4] G. Gao, H.B. Wu, X.W.D. Lou, *Adv. Energy Mater.*, 2014, **4**, 1400422.
- [5] L. Shen, Q. Che, H. Li, X. Zhang, *Adv. Funct. Mater.*, 2014, **24**, 2630.
- [6] G. Gao, H.B. Wu, S. Ding, X.W.D. Lou, *Small*, 2015, **11**, 432.
- [7] J. Li, S. Xiong, Y. Liu, Z. Ju, Y. Qian, *ACS Appl. Mater. Interfaces*, 2013, **5**, 981.
- [8] Z. Ju, G. Ma, Y. Zhao, Z. Xing, Y. Qiang, Y. Qian, *Part. Part. Syst. Char.*, 2015, **32**, 1012.
- [9] Y. Chen, M. Zhuo, J. Deng, Z. Xu, Q. Li, T. Wang, *J. Mater. Chem. A*, 2014, **2**, 4449.
- [10] L. Li, Y. Cheah, Y. Ko, P. Teh, G. Wee, C. Wong, S. Peng, M. Srinivasan, *J. Mater. Chem. A*, 2013, **1**, 10935.
- [11] L. Shen, L. Yu, X.Y. Yu, X. Zhang, X.W.D. Lou, *Angew. Chem. Int. Ed.*, 2015, **54**, 1868.
- [12] J. Cheng, Y. Lu, K. Qiu, H. Yan, J. Xu, L. Han, X. Liu, J. Luo, J.-K. Kim, Y. Luo, *Sci. Rep.*, 2015, **5**, 12099.
- [13] G. Chen, J. Yang, J. Tang, X. Zhou, *RSC Adv.*, 2015, **5**, 23067.
- [14] T. Li, X. Li, Z. Wang, H. Guo, Y. Li, *J. Mater. Chem. A*, 2015, **3**, 11970.
- [15] J. Pu, Z. Liu, Z. Ma, J. Wang, L. Zhang, S. Chang, W. Wu, Z. Shen, H. Zhang, *J. Mater. Chem. A*, 2016, **4**, 17394.
- [16] J. Chen, Q. Ru, Y. Mo, S. Hu, X. Hou, *Phys. Chem. Chem. Phys.*, 2016, **18**, 18949.
- [17] K. Zhou, Z. Hong, C. Xie, H. Dai, Z. Huang, *J. Alloys and Compounds*, 2015, **651**, 24.
- [18] X. Zhang, Y. Zhao, C. Wang, X. Li, J. Liu, G. Yue, Z. Zhou, *J. Mater. Sci.*, 2016, **51**, 92965.
- [19] Y. Mo, Q. Ru, J. Chen, X. Song, L. Guo, S. Hu, S. Peng, *J. Mater. Chem. A*, 2015, **3**, 19765.
- [20] F. Fu, J. Li, Y. Yao, X. Qin, Y. Dou, H. Wang, J. Tsui, K.-Y. Chan, M. Shao, *ACS Appl. Mater. Interfaces*, 2017, **9**, 16194.
- [21] Y. Wang, H. Huang, Q. Xie, Y. Wang, B. Qu, *J. Alloys and Compounds*, 2017, **705**, 314.
- [22] H. Kou, X. Li, H. Shan, L. Fan, B. Yan, D. Li, *J. Mater. Chem. A*, 2017, **5**, 17881.
- [23] H. Bian, X. Xiao, S. Zeng, M.-F. Yuen, Z. Li, W. Kang, Y. Denis, Z. Xu, J. Lu, Y.Y. Li,

- J. Mater. Chem. A*, 2017, **5**, 2243.
- [24] F. Zhang, J. Zhu, D. Zhang, U. Schwingenschlögl, H.N. Alshareef, *Nano Lett.*, 2017, **17**, 1302.
- [25] Y. Zheng, T. Zhou, C. Zhang, J. Mao, H. Liu, Z. Guo, *Angew. Chem. Int. Ed.*, 2016, **55**, 3408.
- [26] T. Li, A. Qin, L. Yang, J. Chen, Q. Wang, D. Zhang, H. Yang, *ACS Appl. Mater. Interfaces*, 2017, **9**, 19900.
- [27] J. Cui, Z.-L. Xu, S. Yao, J. Huang, J.-Q. Huang, S. Abouali, M.A. Garakani, X. Ning, J.-K. Kim, *J. Mater. Chemistry A*, 2016, **4**, 10964.
- [28] Y. Xiong, J. Qian, Y. Cao, X. Ai, H. Yang, *ACS appl. Mater. Interfaces*, 2016, **8**, 16684.
- [29] Y. Li, D. Wang, Q. An, B. Ren, Y. Rong, Y. Yao, *J. Mater. Chem. A*, 2016, **4**, 5402.
- [30] Y. Xiong, J. Qian, Y. Cao, X. Ai, H. Yang, *J. Mater. Chem. A*, 2016, **4**, 11351.
